# Supplementary material for: Group and Basis Restricted Non-Negative Matrix Factorization and Random Forest for Molecular Histotype Classification and Raman Biomarker Monitoring in Breast Cancer
Source: PubMed Central journal article supplement (PMC9003771; doi:10.1177/00037028211035398), 2021-08-06
Supplement: sj-pdf-1-asp-10.1177_00037028211035398.pdf [file sj-pdf-1-asp-10.1177_00037028211035398.pdf]

## Supplemental Material

# Group and Basis Restricted Non-Negative Matrix Factorization and Random Forest for Molecular Histotype Classification and Raman Biomarker Monitoring in Breast Cancer

Xinchen Deng<sup>1</sup>, Kirsty Milligan<sup>1</sup>, Ramie Ali-Adeeb<sup>1</sup>, Phillip Shreeves<sup>2</sup>, Alexandre Brolo<sup>3</sup>, Julian J. Lum<sup>4,5</sup>, Jeffrey L. Andrews<sup>2</sup>, and Andrew Jirasek<sup>1\*</sup>

**Figure S1.** Reference Raman spectra of chemical bases.

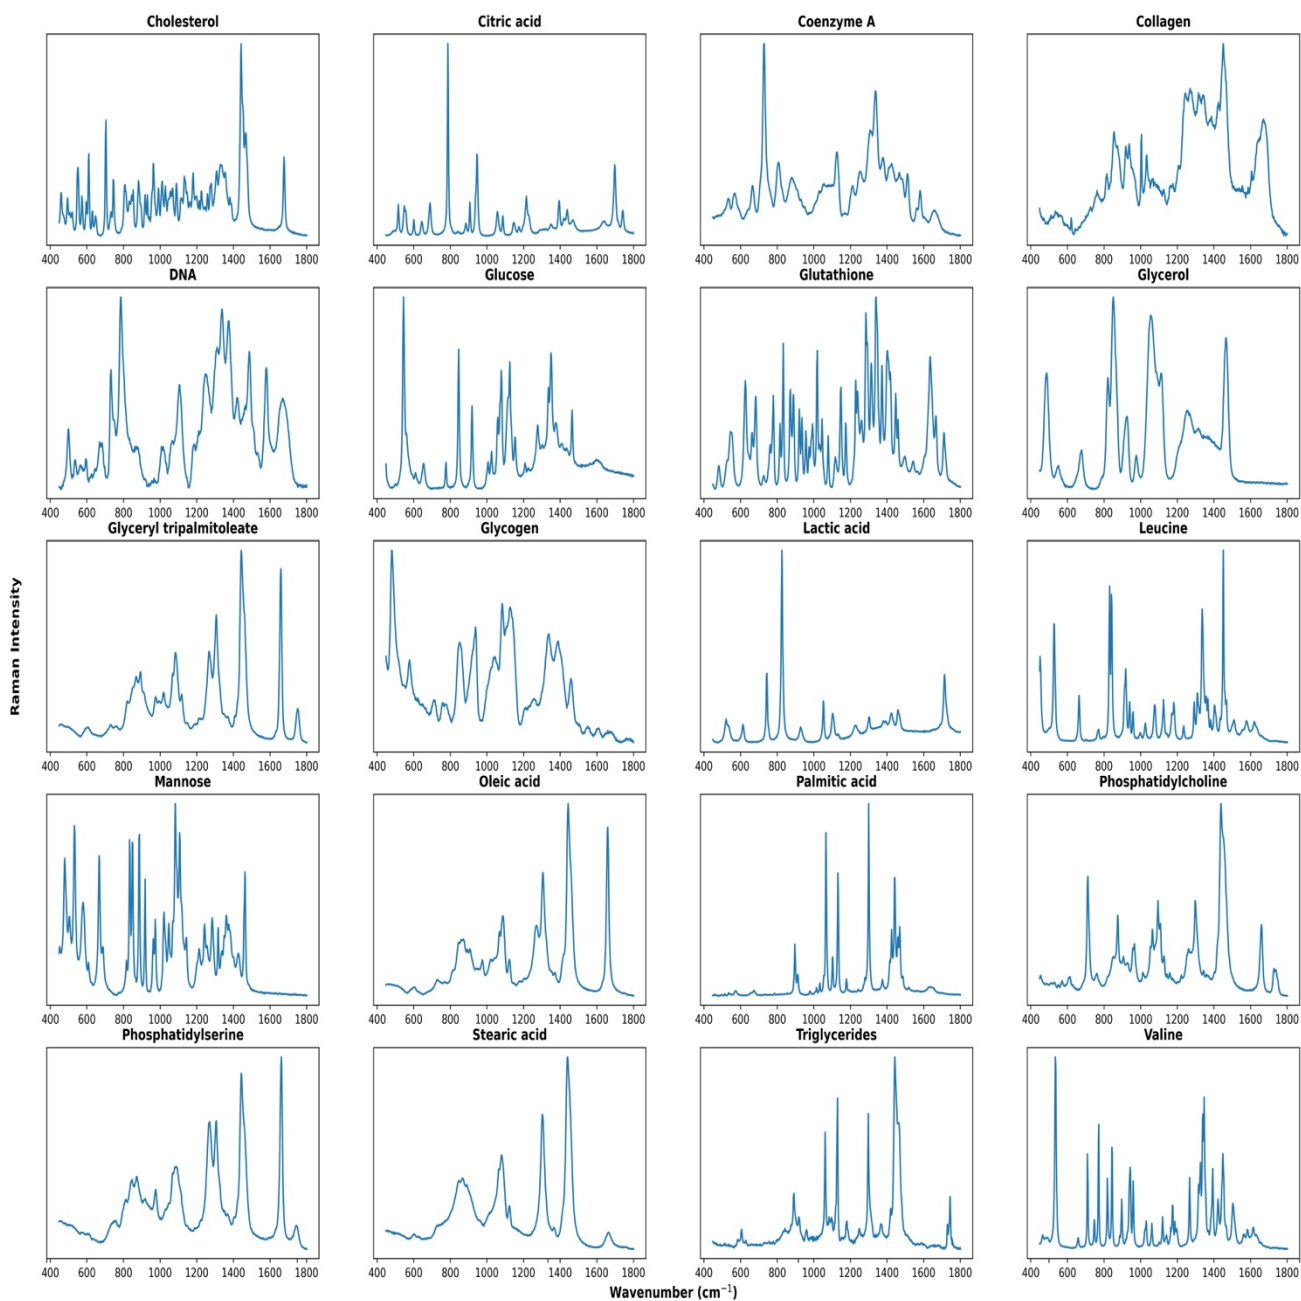

**Table S1.** The 16-reference biochemical Raman library.

---

Cholesterol  
Citric acid  
Coenzyme A  
DNA  
Glucose  
Glutathione  
Glycerol  
Glyceryl tripalmitoleate  
Glycogen  
Lactic acid  
Mannose  
Oleic acid  
Palmitic acid  
Phosphatidylcholine  
Phosphatidylserine  
Steric acid

---

**Table S2.** The 20-reference biochemical Raman chemical library.

---

Cholesterol  
Citric acid  
Coenzyme A  
Collagen  
DNA  
Glucose  
Glutathione  
Glycerol  
Glyceryl tripalmitoleate  
Glycogen  
Lactic acid  
Leucine  
Mannose  
Oleic acid  
Palmitic acid  
Phosphatidylcholine  
Phosphatidylserine  
Stearic acid  
Triglycerides  
Valine

---

**Table S3.** Summary of classification tests and training and testing set sizes.

| Classification tests <sup>a</sup> | Positive cell lines       | Negative cell lines | Positive training | Negative training | Positive testing | Negative testing |
|-----------------------------------|---------------------------|---------------------|-------------------|-------------------|------------------|------------------|
| HER2                              | MCF10A, MCF-7, MDA-MB-231 | BT-474, SK-BR-3     | 432               | 288               | 288              | 192              |

|               |                                    |                             |     |     |     |     |
|---------------|------------------------------------|-----------------------------|-----|-----|-----|-----|
| PR/ER         | MCF10A, MDA-MB-231, S-KBR-3        | MCF-7, BT-474               | 432 | 288 | 288 | 192 |
| Ki67          | MCF10A, MCF-7                      | MDA-MB-231, BT-474, SK-BR-3 | 288 | 432 | 192 | 288 |
| Cancer or not | MCF-7, MDA-MB-231, BT-474, S-KBR-3 | MCF10A                      | 576 | 144 | 384 | 96  |

<sup>a</sup>Cell subtype (MCF10A, MCF-7, MDA-MB-231, BT-474, SK-BR-3) multiclass classification: Each cell line is a class, with 144 training and 96 testing spectra in each class.
